# Supplementary material
Source: PubMed Central journal article supplement (PMC5745548)

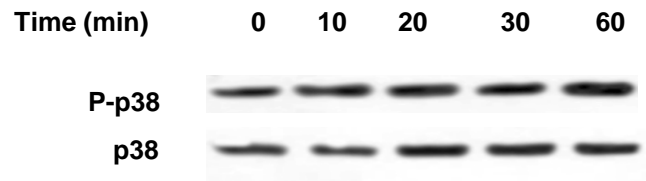

**Supplemental Figure S1**

Supplement: mmc1.pdf [file mmc1.pdf]

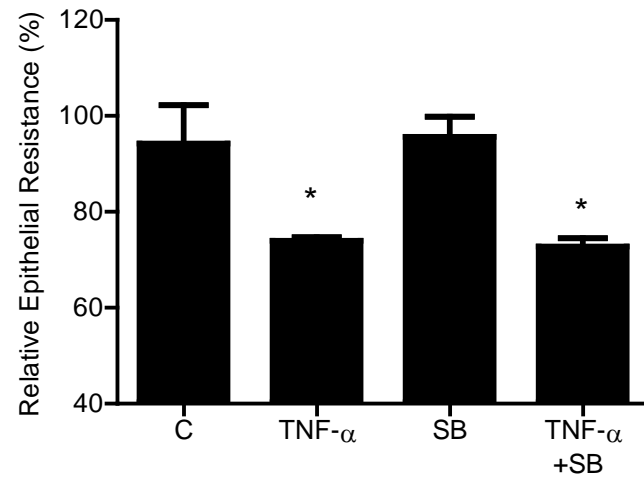

**Supplemental Figure S2**

Supplement: mmc2.pdf [file mmc2.pdf]
